# Supplementary figures and images for: Zn- and Cd-based coordination polymers with a novel anthracene dicarboxylate ligand for highly selective detection of hydrogen peroxide
Source: Royal Society of Chemistry journal article supplement (doi:10.1039/d0dt00333f), 2020-01-01

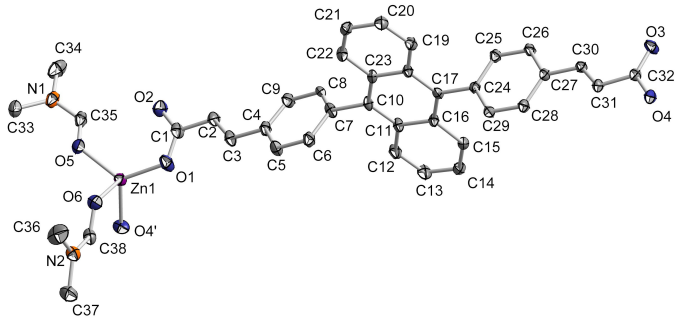

Supplement: d0dt00333f3.pdf [file d0dt00333f3.pdf]

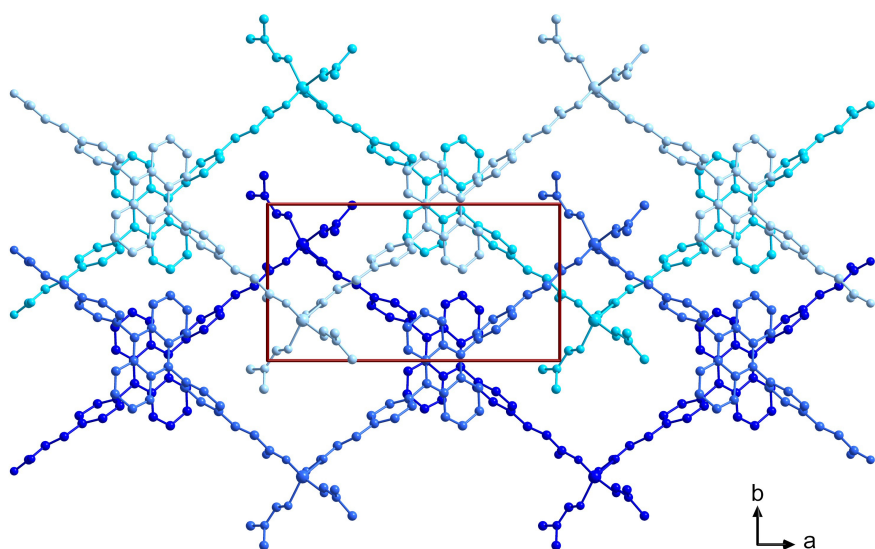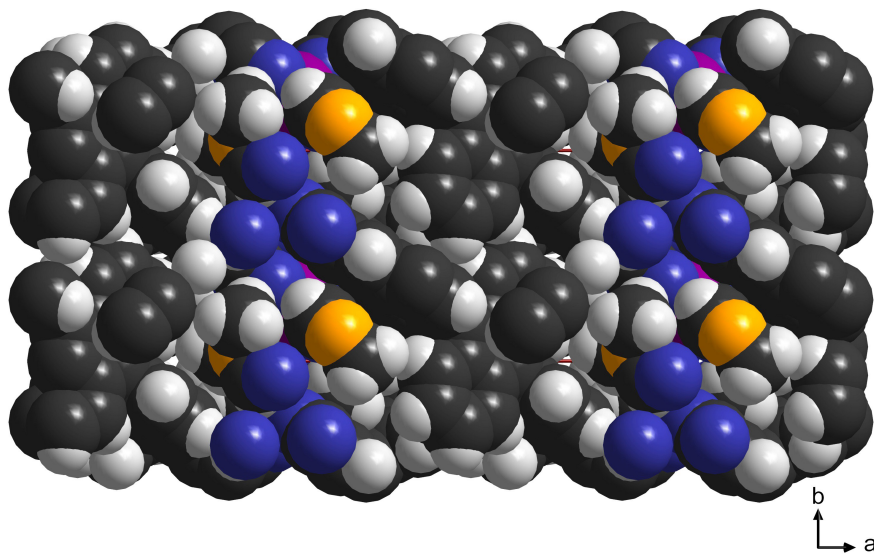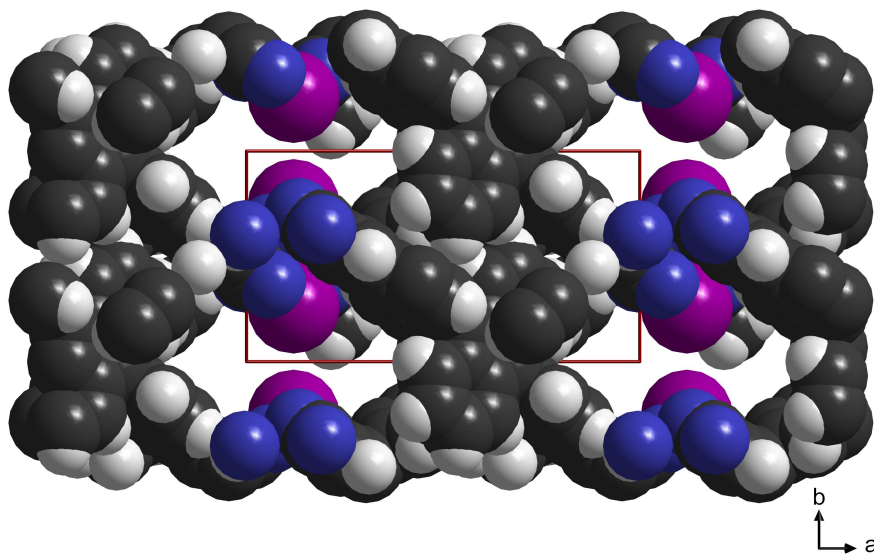

Supplement: d0dt00333f5.pdf [file d0dt00333f5.pdf]
